# Supplementary material for: Efficacy and safety analysis of a HER2-targeting antibody-drug conjugate combined with immune checkpoint inhibitors in solid tumors: a real-world study
Source: Aging (Albany NY). 2023 Dec 22;15(24):15473–88. doi: 10.18632/aging.205382 (PMC10781476; doi:10.18632/aging.205382)
Supplement: Supplementary Figures [file aging-15-205382-s001.pdf]

SUPPLEMENTARY FIGURES

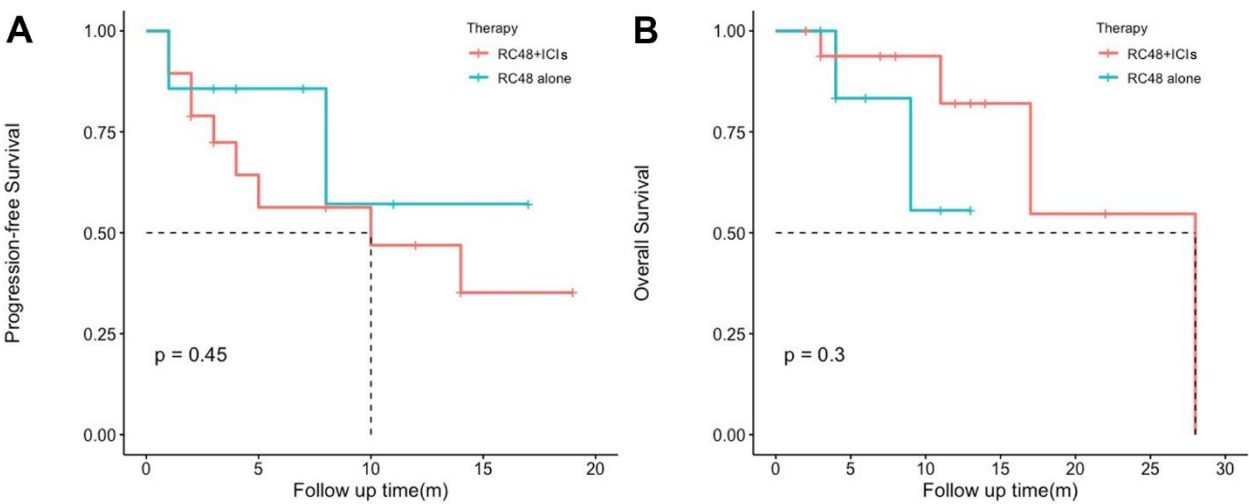

Supplementary Figure 1. Progression-free survival (PFS) of patients with urinary cancer (A) and other cancers (B).

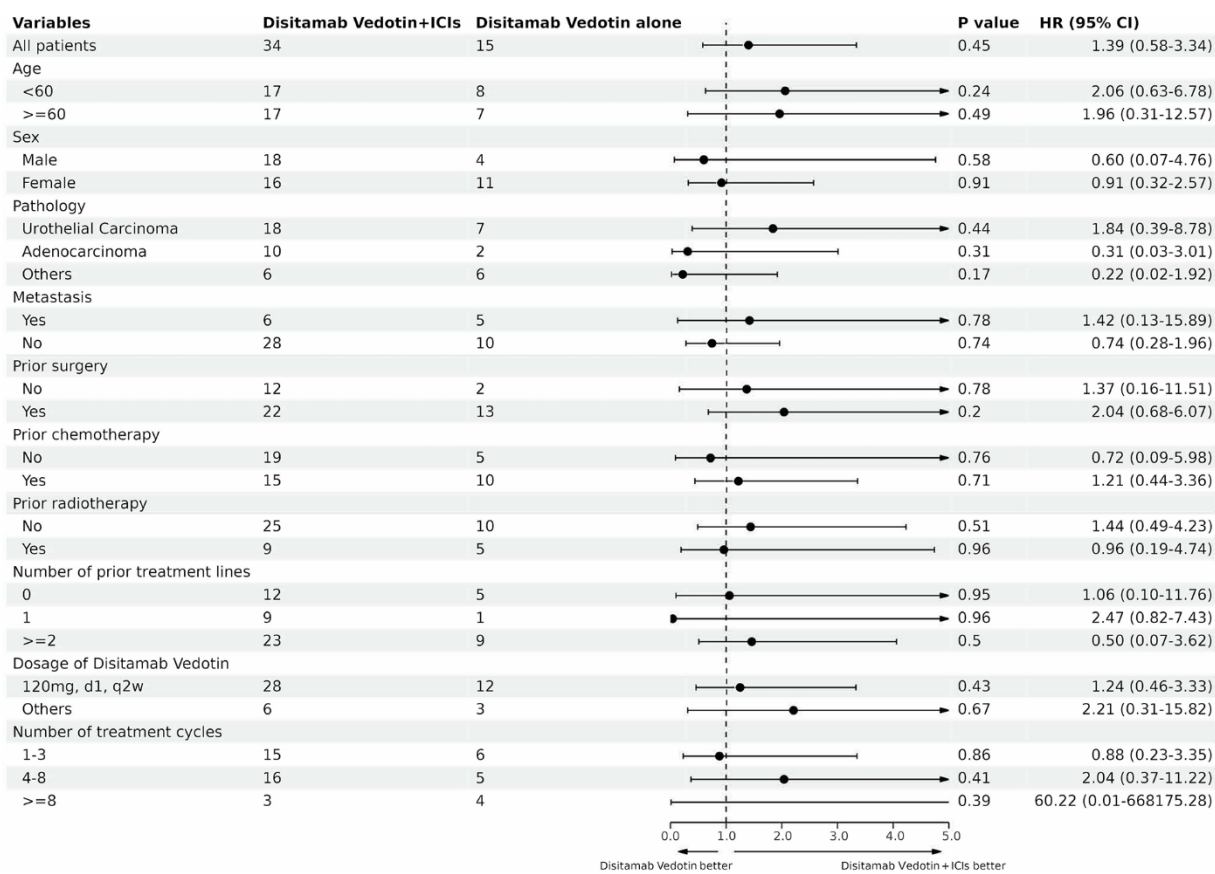

Supplementary Figure 2. Stratified survival analyses of the Disitamab Vedotin combined with ICIs and Disitamab Vedotin cohorts (progression-free survival).

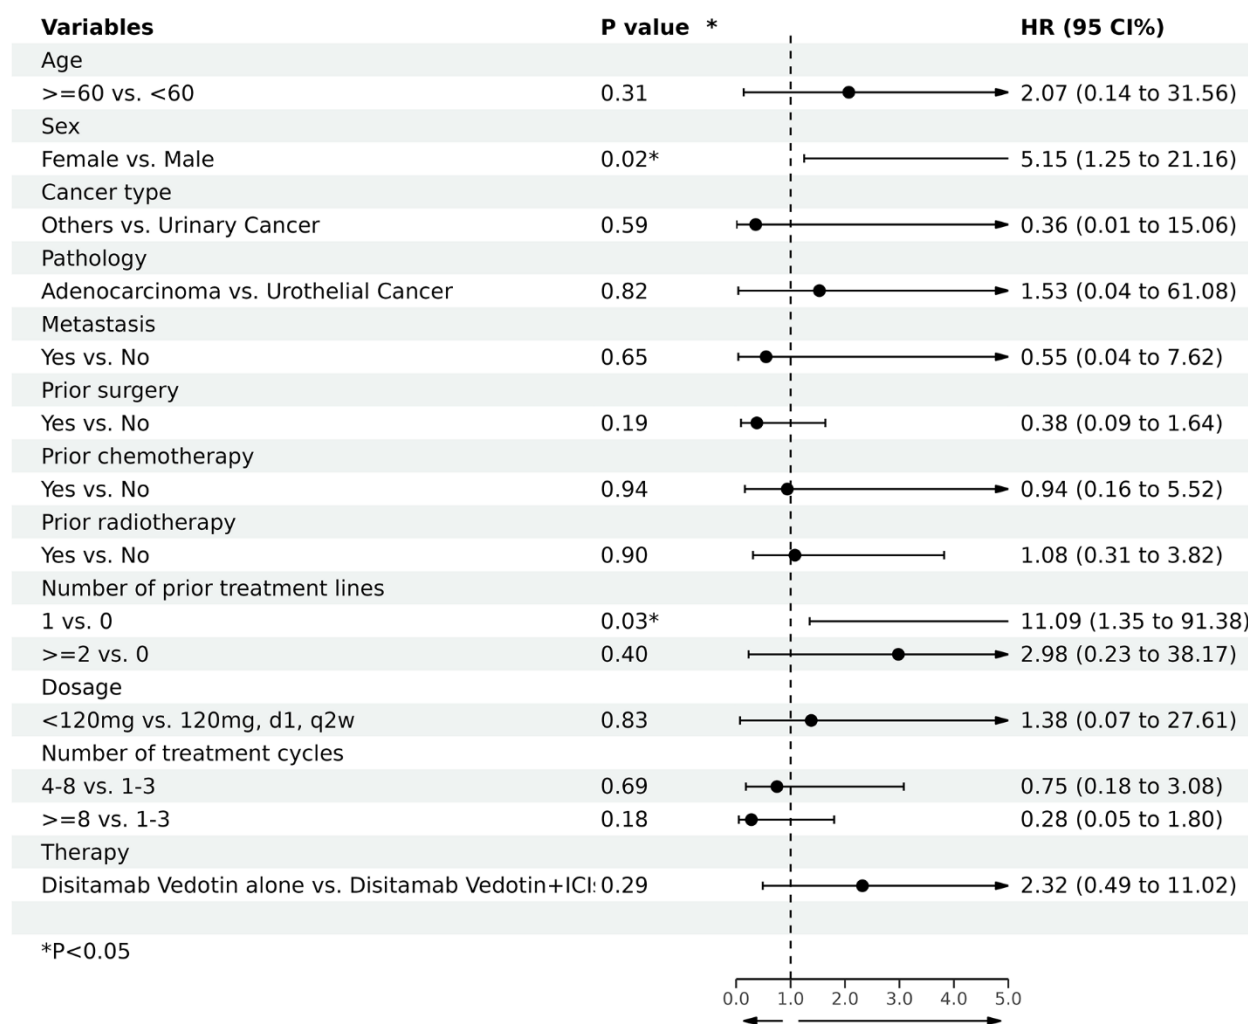

**Supplementary Figure 3. Multivariate analysis of the associations between progression-free survival and clinicodemographic variables.**
