# Supplementary material for: Evaluasi Fleksibilitas Rantai Pasok Persahaan(Studi Kasus di PT Coca Cola Bottling Indonesia Central Java)
Source: publisher site journal article supplement (doi:10.18632/aging.205382), 2008-01-01
Supplement: Supplementary file [file aging-v15i24-205382-supplementary-material-SD2.pdf]

## SUPPLEMENTARY TABLES

**Supplementary Table 1. ICIs applied in this study.**

| Name of ICIs  | Target     | No. of treated patients | %          |
|---------------|------------|-------------------------|------------|
| Toripalimab   |            | 14                      | 47.0       |
| Tislelizumab  |            | 6                       | 17.6       |
| Camrelizumab  | PD-1       | 3                       | 8.8        |
| Pembrolizumab |            | 2                       | 5.9        |
| Serplulimab   |            | 3                       | 8.8        |
| Sintilimab    |            | 2                       | 5.9        |
| Atezolizumab  | PD-L1      | 1                       | 2.9        |
| Envofolimab   |            | 1                       | 2.9        |
| Cadonilimab   | PD-1+CTL-4 | 2                       | 5.9        |
| <b>All</b>    |            | <b>34</b>               | <b>100</b> |

**Supplementary Table 2. Best overall tumor responses in the urinary cancer populations.**

| Populations              | Total no. | PD, no. (%)     | SD, no. (%)     | PR, no. (%)     | ORR (95% CI)            | DCR (95% CI)            |
|--------------------------|-----------|-----------------|-----------------|-----------------|-------------------------|-------------------------|
| <b>Treatment</b>         |           |                 |                 |                 |                         |                         |
| Disitamab Vedotin + ICIs | 19        | 6 (31.6)        | 6 (31.6)        | 7 (36.8)        | 36.8 (17.2-61.4)        | 68.4 (43.5-86.4)        |
| Disitamab Vedotin alone  | 7         | 2 (28.6)        | 3 (42.9)        | 2 (28.6)        | 28.6 (5.1-69.7)         | 57.1 (20.2-88.2)        |
| <b>HER2 expression</b>   |           |                 |                 |                 |                         |                         |
| 0-1+                     | 5         | 2 (40.0)        | 1 (20.0)        | 2 (40.0)        | 40.0 (7.3-83.0)         | 60.0 (17.0-92.7)        |
| 2-3+                     | 18        | 4 (22.2)        | 8 (44.4)        | 6 (33.3)        | 33.3 (14.3-58.8)        | 55.6 (31.4-77.6)        |
| Unknown                  | 3         | 2 (66.7)        | 0 (0.0)         | 1 (33.3)        | 33.3 (1.8-87.5)         | 33.3 (1.8-87.5)         |
| <b>All populations</b>   | <b>26</b> | <b>8 (30.8)</b> | <b>9 (34.6)</b> | <b>9 (34.6)</b> | <b>34.6 (18.0-55.6)</b> | <b>69.2 (48.1-85.0)</b> |

**Supplementary Table 3. Detailed information on 12 patients with rare tumors.**

| Patient number | Combined ICI | Age | Sex    | Cancer type                | Therapy line | Her2 expression level | Best response | PFS (months) | OS (months) |
|----------------|--------------|-----|--------|----------------------------|--------------|-----------------------|---------------|--------------|-------------|
| 1              | PD-1         | 56  | Female | Cholangiocarcinoma         | 1            | 1                     | SD            | 4*           | 4*          |
| 2              | PD-1         | 31  | Male   | Scroti carcinoma           | 3            | 2                     | PR            | 8*           | 8*          |
| 3              | PD-L1        | 69  | Female | Lung cancer                | 6            | Uk                    | PD            | 6            | 13*         |
| 4              | PD-1         | 47  | Male   | Salivary duct carcinoma    | 7            | 2                     | PR            | 7            | 11*         |
| 5              | PD-1         | 51  | Male   | Extramammary Paget disease | 2            | Uk                    | PR            | 11*          | 11*         |
| 6              | PD-1         | 28  | Female | Pancreatic cancer          | 3            | 1                     | SD            | 14*          | 14*         |
| 7              | PD-1         | 62  | Male   | Salivary duct carcinoma    | 2            | 2                     | PR            | 15*          | 15*         |
| 8              | PD-1         | 57  | Female | Cervical Cancer            | 3            | Uk                    | PD            | 7            | 20*         |
| 9              | PD-1         | 57  | Male   | Esophageal cancer          | 2            | 3                     | PR            | 13*          | 13*         |
| 10             | -            | 56  | Female | Ampullary carcinoma        | 3            | 2                     | PD            | 3            | 9*          |
| 11             | PD-1         | 41  | Female | Ovarian cancer             | 2            | Uk                    | SD            | 21*          | 21*         |
| 12             | PD-1         | 60  | Male   | Scroti carcinoma           | 3            | 2                     | PR            | 5*           | 5*          |

\*Events did not happen until the end of the follow-up.

Abbreviation: PFS, progression-free survival; OS, overall survival; Uk, unknown; PR, partial response; PD, progression disease; SD, stable disease.
